# Supplementary material
Source: publisher figshare collection journal article supplement (https://karger.figshare.com/ndownloader/files/17991452)
Supplement: Supplementary file 1 [file 17991452]

Supplementary Table 3. Results from logistic path model 2: logistic regression coefficients,

standard errors, z-test statistics, odds ratios with 95% CI.

| Path | Estimate (SE) | Z  statistic | Odds Ratio | 95% CI for  Odds Ratio |
| --- | --- | --- | --- | --- |
| Intercept (BCS) | -1.82*** (0.33) | -5.49 |  |  |
| Intercept (MDR) | -3.75*** (0.66) | -5.67 |  |  |
| SES -> UICC | 0.26 (0.15) | 1.67 | 1.29 | [0.96 ; 1.75] |
| Disability severity -> UICC | 0.12*** (0.03) | 3.49 | 1.13 | [1.05 ; 1.20] |
| UICC -> BCS | 0.77*** (0.11) | 7.32 | 2.16 | [1.76 ; 2.65] |
| SES -> BCS | 0.64** (0.22) | 2.91 | 1.90 | [1.23 ; 2.92] |
| Disability severity -> BCS | 0.16*** (0.04) | 3.80 | 1.18 | [1.08 ; 1.28] |
| UICC -> MDR | 0.40 (0.21) | 1.89 | 1.48 | [0.98 ; 2.24] |
| SES -> MDR | 1.91*** (0.41) | 4.66 | 6.73 | [3.02 ; 14.99] |
| Disability severity -> MDR | 0.09 (0.08) | 1.01 | 1.09 | [0.92 ; 1.28] |
| Disability severity -> SES | 0.34*** (0.04) | 8.20 | 1.40 | [1.29 ; 1.52] |

Note: N=780; ** p < .01, *** p < .001; BCS = breast-conserving surgery; MDR = mastectomy with direct reconstruction (mastectomy without direct reconstruction = reference category); SES = socio-economic status class 2 (class 1 = reference category)
